# Supplementary material for: Controlling particle deposit morphologies in drying nano-particle laden sessile droplets using substrate oscillations
Source: Royal Society of Chemistry journal article supplement (doi:10.1039/c6cp01272h), 2016-01-01
Supplement: c6cp01272h3.pdf [file c6cp01272h3.pdf]

# Controlling particle deposit morphologies in drying nano-particle laden sessile droplets using substrate oscillations

Apratim Sanyal<sup>1</sup>, Saptarshi Basu<sup>1\*</sup>, Swetaprovo Chaudhuri<sup>2</sup>

<sup>1</sup>Department of Mechanical Engineering, Indian Institute of Science, Bangalore, India

<sup>2</sup>Department of Aerospace Engineering, Indian Institute of Science, Bangalore, India

\*Corresponding author email: sbasu@mecheng.iisc.ernet.in

## Electronic Supplementary information

Derivation of the evaporation time scale  $\tau_e$  -

To evaluate this timescale, a completely spherical droplet with radius  $R_0'$  is considered (far away from any substrate) with identical mass as that of the sessile droplet -

$$m = \frac{\rho_l \pi R_0'^3}{3} (\cos^3 \theta_c - 3 \cos \theta_c + 2) = \frac{4}{3} \rho_l \pi R_0'^3 \quad (1)$$

The evaporation rate through vapor diffusion for this spherical droplet at  $t=0$  can be approximated as [1] -

$$\left( \frac{dm}{dt} \right)_{t=0} = 4\pi DC_{sat} R_0' (1 - RH) \quad (2)$$

From eqn. 1 and eqn. 2, the measure of the evaporative time scale thus becomes

$$\tau_e : m \left[ \left( \frac{dm}{dt} \right)_{t=0} \right]^{-1} = \frac{\rho_l \left[ R_0'^3 (\cos^3 \theta_c - 3 \cos \theta_c + 2) \right]^{\frac{2}{3}}}{DC_{sat} (1 - RH)}$$

In the above,  $\rho_l$  is the density of water,  $D$  is the diffusivity of water vapor in air,  $C_{sat}$  is the saturation density of the same in air and  $RH$  is the ambient relative humidity. Any numerical constants have been discarded in the final expression of  $\tau_e$ .

1. R. G. Picknett, and R. Bexon, J Colloid Interface Sci. 61, 336 (1977).
